# Changes in Bone Density and Turnover Explain the Reductions in Incidence of Nonvertebral Fractures that Occur during Treatment with Antiresorptive Agents

MARC C. HOCHBERG, SUSAN GREENSPAN, RICHARD D. WASNICH, PAUL MILLER, DESMOND E. THOMPSON, AND PHILIP D. ROSS

University of Maryland School of Medicine (M.C.H.), Baltimore, Maryland 21201; University of Pittsburgh School of Medicine (S.G.), Pittsburgh, Pennsylvania 15213; Hawaii Osteoporosis Center (R.D.W.), Honolulu, Hawaii 96814; Colorado Center for Bone Research (P.M.), Denver, Colorado 80227; and Merck & Co., Inc. (D.E.T., P.D.R.), Rahway, New Jersey 07065

Some, but not all, antiresorptive agents have been shown to reduce the risk of nonvertebral fractures. Agents that significantly reduced nonvertebral fracture risk also appear to produce larger mean increases in bone mineral density (BMD) and reductions in biochemical markers (BCM) of bone turnover, compared with other agents. To examine the extent to which increases in BMD and reductions in BCM during antiresorptive therapy are associated with reductions in risk of nonvertebral fractures, we performed a meta-analysis of all randomized, placebo-controlled trials of antiresorptive agents conducted in postmenopausal women with osteoporosis (*i.e.* prior vertebral fracture or low BMD) with available relevant data. A total of 18 such trials with usable data were identified, including a total of 2,415 women with incident nonvertebral fractures over 69,369 women-years of follow-up. Poisson regression was used to estimate the association between changes in BMD or BCM during the first year and overall reductions in risk of nonvertebral fractures (*vs.* the placebo group) across all trials. Larger increases in BMD and larger reductions in BCM were significantly associated with greater reductions in nonvertebral fracture risk. For exam-

ple, each 1% increase in spine BMD at 1 yr was associated with an 8% reduction in nonvertebral fracture risk ( $P = 0.02$ ). Mean BMD changes at the hip were smaller than at the spine, but the predicted net effect on fracture risk was the same; an agent that increases spine BMD by 6% at 1 yr reduces nonvertebral fracture risk by about 39%, and an agent that increases hip BMD by 3% at 1 yr reduces nonvertebral fracture risk by about 46%. The results also predict that a 70% reduction in resorption BCM would reduce risk by 40%, and a 50% reduction in formation BCM would reduce risk by 44%. It appears that either BMD or BCM changes are able to explain the effect of treatment, because a separate variable for treatment was not independently significant in any models. These data demonstrate that larger increases in BMD at both the spine and hip and larger reductions in both formation and resorption BCM are associated with greater reductions in the risk of nonvertebral fractures. Antiresorptive agents that do not produce large increases in BMD or large reductions in BCM do not appear to and would not be expected to decrease the risk of nonvertebral fractures. (*J Clin Endocrinol Metab* 87: 1586–1592, 2002)

**B**ONE MINERAL DENSITY (BMD) is a major determinant of bone strength and fracture risk. Most of the variability in bone strength is related to BMD *in vitro*, and low BMD is an important predictor of fracture risk in prospective studies of people (1–3). The relationship between BMD and fracture risk is nonlinear in that small reductions in BMD are associated with greater proportional increases in fracture risk (1, 4). There is also evidence that increased levels of bone turnover, as measured by biochemical markers (BCMs) of either bone formation or resorption, are associated with increased fracture risk (5, 6).

Antiresorptive agents reduce the rate of bone turnover and increase BMD to varying degrees, and a number of these agents have been approved for the treatment of osteoporosis in the United States (7–13). Some agents have been shown to reduce the incidence of radiographic and clinical vertebral fractures (14). Alendronate and risedronate have been shown to significantly reduce the risk of nonvertebral fractures, whereas other agents such as raloxifene and calcitonin have not (14).

Abbreviations: BCM, Biochemical markers; BMD, bone mineral density; RR, relative risk.

Prior analyses of data from randomized placebo-controlled clinical trials conducted in postmenopausal women suggest that increases in BMD during antiresorptive therapy account for much of the reduction in risk of radiographic vertebral fractures (15, 16). Despite these analyses, there continues to be a debate regarding the extent to which reductions in fracture risk during antiresorptive therapy may be related to changes in BMD (1, 17). For example, it has been proposed that some antiresorptive agents might reduce vertebral fracture risk substantially by reducing rates of bone resorption while having little or no effect on BMD (9, 17). Part of the rationale for this hypothesis is that maximum effects on BCM are generally achieved within the first 6–12 months, and substantial reductions in fracture risk have also been reported within the first 12–18 months (14). However, a large proportion of the observed increases in BMD also occurs within the first 18 months, although BMD continues to increase progressively over time up to at least 7 yr in some studies (18). Although one study reported that reductions in bone turnover during treatment were associated with a reduction in vertebral fracture risk, the analyses did not directly evaluate the extent to which changes in turnover could

explain the effect of treatment, nor did they evaluate the extent to which changes in turnover were related to changes in BMD (19).

The analyses described here further explore these issues for the outcome of symptomatic nonvertebral fractures, and for early (1 yr) changes in BMD and BCM. The objective of this study was to examine the associations between changes in BMD and BCM with reductions in the risk of symptomatic nonvertebral fractures by conducting a meta-analysis of randomized placebo-controlled clinical trials of antiresorptive agents in postmenopausal women with osteoporosis.

## Materials and Methods

Randomized, placebo-controlled, double-blind, clinical trials of antiresorptive agents that reported both changes in BMD (or BCM) and incidence of nonvertebral fractures were identified from a systematic literature review and from abstracts in conference proceedings (Table 1) (14, 20). The analysis was limited to studies that recruited postmenopausal women with osteoporosis (those with existing vertebral fractures and/or low BMD). Trials that compared calcium or vitamin D to placebo were not considered, because most of the trials of pharmacological agents provided calcium and/or vitamin D to participants, so the effects of the pharmacological agents are above and beyond those of calcium or vitamin D.

Poisson regression was used to pool the data across all trials and to examine the associations of treatment and changes in BMD (or BCM) during the first year with reduction in risk of nonvertebral fracture over the duration of each study. The Poisson model gives greater weight to larger studies with higher numbers of fracture events and appropriately calculates associations for studies that include more than one active treatment group compared with a single placebo group. The independent (predictor) variables were change in BMD (or BCM), treatment assignment, and an indicator variable for each trial. The dependent (outcome) variable was nonvertebral fracture incidence. Where not provided in the original report, patient-years of follow-up were calculated by multiplying the number of patients with follow-up by the duration of the study. When a substantial proportion of participants dropped out of a study, follow-up was calculated by linear interpolation between the number of women at baseline and at completion.

A separate model was used for each measure of BMD and BCM at 1 yr: one each for change in spine and change in hip BMD, and one each for change in resorption and change in formation BCM. Models were also examined using BMD changes at the end of each study. We also tested models that included combinations of BMD change and BCM change. The sensitivity of the results to individual trials was evaluated

by excluding trials singly and repeating the analysis. The sensitivity of the results to individual pharmacological agents was evaluated by excluding all trials of that specific agent and repeating the analysis. The site of hip BMD measurements varied among studies (Table 2). For BCM, the types of assays varied among studies; the resorption markers included urinary deoxypyridinoline, collagen type I cross-linked N-telopeptide, and collagen type I cross-linked C-telopeptide (one small study (21) reported urinary hydroxyproline); formation markers included serum osteocalcin and bone-specific alkaline phosphatase. The differences in hip BMD measurements are unlikely to substantially influence the findings, because the same measurements were used for both the placebo and treatment groups in each study, and changes in total hip and femoral neck BMD were generally similar within each study when both were measured. Although the same assay was used for both the placebo and treatment groups within each study, differences in BCM assays among studies may have greater potential to influence the findings, with uncertain consequences.

## Results

A total of 18 studies were identified that satisfied the inclusion criteria (7–9, 13, 21–34). These studies enrolled 26,494 women and accumulated a total follow-up of 69,369 woman-years, during which 2,415 women experienced one or more new nonvertebral fractures (Table 2). The eight largest studies accounted for 92% of follow-up time and 90% of all new fracture cases.

The relative risk (RR) and percentage reduction in RR of nonvertebral fracture is plotted against the changes in BMD and BCM (relative to placebo) for the treatment group in each trial in Figs. 1–4. Most, but not all, studies observed reductions in risk of nonvertebral fractures. For studies with small numbers of events, however, these RR estimates are unstable with wide confidence intervals (confidence intervals are not shown). On the other hand, studies with large numbers of events have relatively stable estimates with narrower confidence intervals.

Poisson regression models were used to pool data across all trials and obtain the best fit, giving greater weight to larger studies (Figs. 1–4). Larger increases in BMD at both the lumbar spine and hip during treatment were significantly associated with greater reductions in the risk of nonvertebral fracture ( $P = 0.02$  and  $0.006$ , respectively). Larger increases

**TABLE 1.** Descriptive characteristics for the randomized trials

| Study (reference no.) | N: initial/final    | Duration (yr) | Age: mean; range (yr) | Baseline vertebral fracture (%) | Spine BMD (T-score) | Hip BMD (T-score) | Incident fracture types                    |
|-----------------------|---------------------|---------------|-----------------------|---------------------------------|---------------------|-------------------|--------------------------------------------|
| 7                     | 7,705/5,901         | 3             | 67; 31–80             | 59                              | –2.6                | –2.5              | Excluded if violent, finger, or skull      |
| 22                    | 3,658/3,585         | 3.5           | 70; 54–81             | 55                              | –2.3                | –2.7              | Excluded if violent, face, or skull        |
| 33                    | 5,445/3,086         | 3             | 74; 70–79             | 39                              |                     | –3.7              | Wrist, leg, humerus, hip, pelvis, clavicle |
| 8                     | 1,628/939           | 3             | 69; ≤85               | 100                             | –2.4                | –2.6              | Clavicle, humerus, wrist, pelvis, hip, leg |
| 9                     | 1,255/626 (at 3 yr) | 5             | 68                    | 79                              | –2.3                |                   | Not stated                                 |
| 10, 25                | 994/881             | 3             | 64; 45–80             | 20                              | –3.1                | –2.5              | No exclusions                              |
| 13                    | 1,226/472           | 3             | 71; ≤85               | 100                             | –2.7                |                   | Clavicle, humerus, wrist, pelvis, hip, leg |
| 23                    | 1,908/1,697         | 1             | 63; 39–84             | Not stated                      | –3.0                | –2.1              | No exclusions                              |
| 24                    | 423/289             | 3             | 65; <75               | 100                             | –2.8                |                   | All fractures; nonviolent, non-metastatic  |
| 28                    | 359/341             | 2             | 71; 60–85             | 38                              | –3.0                |                   | No exclusions                              |
| 30                    | 425/320             | 2             | 62; 42–82             | Not stated                      | –2.5                |                   | No exclusions                              |
| 21                    | 208/164             | 2             | 70; 68–72             | Not stated                      | –3.1                |                   | Nonviolent                                 |
| 29                    | 286/260             | 2             | 59; 48–76             | 5                               | –2.9                | –1.8              | Not stated                                 |
| 27                    | 66/40               | 3             | 68; 56–75             | 100                             |                     |                   | No exclusions                              |
| 31                    | 143/130             | 1             | 68; 45–75             | 100                             | –2.5                | –2.2              | Atraumatic                                 |
| 32                    | 132/93              | 3             | 68; 53–81             | 100                             | –2.5                | –2.2              | No exclusions                              |
| 34                    | 188/154             | 2             | 63; 42–75             | Not stated                      | –2.7                | –1.8              | All fractures                              |
| 26                    | 488/424             | 2             | 62; 50–80             | 0                               | –2.9                |                   | Low energy fractures                       |

**TABLE 2.** Nonvertebral fracture incidence and changes in BMD and BCM from the randomized trials

| Study<br>(reference no.) | Agent                     | Dose                 | 1 yr<br>spine<br>BMD<br>(%) <sup>a</sup> | Final<br>spine<br>BMD<br>(%) <sup>a</sup> | 1 yr hip<br>BMD<br>(%) <sup>a</sup> | Final<br>hip<br>BMD<br>(%) <sup>a</sup> | Resorption<br>marker (%) <sup>a</sup> | Formation<br>marker (%) <sup>a</sup> | Fracture<br>cases (n) | Patient-<br>years | RR                |
|--------------------------|---------------------------|----------------------|------------------------------------------|-------------------------------------------|-------------------------------------|-----------------------------------------|---------------------------------------|--------------------------------------|-----------------------|-------------------|-------------------|
| 7                        | Raloxifene                | 60 and 120 mg        | 2.6                                      | 2.7                                       | 1.3 <sup>b</sup>                    | 2.3 <sup>b</sup>                        | –25 (at 3 yr)                         | –20 (at 3 yr)                        | 677                   | 23,115            | 0.91              |
| 22                       | Alendronate               | 5 and 10 mg          | 3.6                                      | 6.6                                       | 1.8                                 | 4.9                                     | –39                                   | –29                                  | 518                   | 12,729            | 0.71 <sup>c</sup> |
| 33                       | Risedronate               | 2.5 and 5 mg         |                                          |                                           |                                     | 2.8 <sup>b</sup>                        |                                       |                                      | 499                   | 12,523            | 0.79 <sup>c</sup> |
| 8                        | Risedronate               | 5 mg                 | 3.0                                      | 4.1                                       | 1.7 <sup>b</sup>                    | 2.0 <sup>b</sup>                        | –30 (at 6<br>months)                  | –23 (at 6<br>months)                 | 85                    | 4,881             | 0.64 <sup>c</sup> |
| 9                        | Calcitonin                | 100 IU               | 1.0                                      | 0.5                                       |                                     |                                         | –11                                   |                                      | 32                    | 999               | 0.67 <sup>c</sup> |
| 9                        | Calcitonin                | 200 IU               | 1.2                                      | 0.7                                       |                                     |                                         | –12                                   |                                      | 46                    | 999               | 0.96              |
| 9                        | Calcitonin                | 400 IU               | 1.0                                      | 1.1                                       |                                     |                                         | –16                                   |                                      | 41                    | 999               | 0.85              |
|                          |                           |                      |                                          |                                           |                                     |                                         |                                       |                                      | PBO, 48               | PBO, 999          |                   |
| 10, 25                   | Alendronate               | 5–20 mg              | 5.7                                      | 7.6                                       | 1.9 <sup>b</sup>                    | 3.6 <sup>b</sup>                        | –49                                   | –38                                  | 83                    | 2,540             | 0.79              |
| 13                       | Risedronate               | 5 mg                 | 3.9                                      | 5.9                                       | 0.8 <sup>b</sup>                    | 4.0 <sup>b</sup>                        | –37 (at 6<br>months)                  | –33 (at 6<br>months)                 | 87                    | 2,436             | 0.71              |
| 23                       | Alendronate               | 10 mg                | 4.9                                      | 4.9                                       | 3.0                                 | 3.0                                     | –53                                   | –41                                  | 56                    | 1,697             | 0.53 <sup>c</sup> |
| 24                       | Etidronate                | 200 mg               | 2.4                                      | 4.1                                       | 1.2                                 | 2.0                                     |                                       |                                      | 67                    | 1,140             | 1.40              |
| 28                       | Alendronate               | 1 mg                 | 0.9                                      | 0.7                                       | 0.3 <sup>b</sup>                    | 1.2 <sup>b</sup>                        | 1                                     | –8                                   | 15                    | 148               | 1.09              |
|                          | Alendronate               | 2.5 mg               | 2.2                                      | 3.5                                       | 0.6 <sup>b</sup>                    | 1.5 <sup>b</sup>                        | –42                                   | –36                                  | 9                     | 149               | 0.59              |
|                          | Alendronate               | 5 mg                 | 4.2                                      | 5.7                                       | 1.5 <sup>b</sup>                    | 3.4 <sup>b</sup>                        | –51                                   | –42                                  | 9                     | 149               | 0.57              |
|                          |                           |                      |                                          |                                           |                                     |                                         |                                       |                                      | PBO, 16               | PBO, 154          |                   |
| 30                       | Alendronate               | 10 mg                | 4.0                                      | 6.6                                       | 2.3                                 | 3.7                                     | –63                                   | –46                                  | 5                     | 184               | 0.68              |
|                          | Estrogen                  |                      | 4.9                                      | 6.6                                       | 2.2                                 | 3.1                                     | –53                                   | –46                                  | 10                    | 286               | 0.87              |
|                          | Alendronate +<br>estrogen | 10 mg                | 5.8                                      | 8.9                                       | 3.1                                 | 4.4                                     | –70                                   | –56                                  | 8                     | 280               | 0.71              |
|                          |                           |                      |                                          |                                           |                                     |                                         |                                       |                                      | PBO, 4                | PBO, 100          |                   |
| 21                       | Calcitonin                | 50 IU                | 1.6                                      | 1.1                                       |                                     |                                         | –8                                    | –12                                  | 0                     | 80                | 0.0               |
|                          |                           | 100 IU               | 0                                        | 1.1                                       |                                     |                                         | –8                                    | –8                                   | 1                     | 86                | 0.47              |
|                          |                           | 200 IU               | 2.2                                      | 1.1                                       |                                     |                                         | –7                                    | –6                                   | 1                     | 82                | 0.49              |
|                          |                           |                      |                                          |                                           |                                     |                                         |                                       |                                      | PBO, 2                | PBO, 80           |                   |
| 29                       | Calcitonin                | 100 IU               | 0.6                                      | –0.8                                      | 0.9 <sup>b</sup>                    | 0.8 <sup>b</sup>                        | 10                                    | –11                                  | 1                     | 150               | 0.31              |
|                          | Alendronate               | 10 mg                | 4.8                                      | 5.2                                       | 2.6 <sup>b</sup>                    | 3.8 <sup>b</sup>                        | –31                                   | –37                                  | 1                     | 146               | 0.33              |
|                          | Alendronate               | 20 mg                | 6.0                                      | 7.3                                       | 2.2 <sup>b</sup>                    | 4.6 <sup>b</sup>                        | –34                                   | –35                                  | 1                     | 144               | 0.33              |
|                          |                           |                      |                                          |                                           |                                     |                                         |                                       |                                      | PBO, 3                | PBO, 142          |                   |
| 27                       | Etidronate                | 200 mg               | 2.3                                      | 8.0                                       |                                     |                                         |                                       |                                      | 11                    | 115               | 0.83              |
| 31                       | Raloxifene                | 60 mg                | 0.8                                      | 0.8                                       | 1.7                                 | 1.7                                     | –25                                   | –15                                  | 0                     | 43                | 0                 |
|                          |                           | 120 mg               | 1.1                                      | 1.1                                       | 1.2                                 | 1.2                                     | –31                                   | –9                                   | 4                     | 45                | 1.33              |
|                          |                           |                      |                                          |                                           |                                     |                                         |                                       |                                      | PBO, 3                | PBO, 45           |                   |
| 32                       | Risedronate               | 2.5 mg cyclical      | 0.8                                      | –0.1                                      | 1.2 <sup>b</sup>                    | 1.8 <sup>b</sup>                        | –28                                   | 7                                    | 9                     | 142               | 2.25              |
|                          | Risedronate               | 2.5 mg<br>continuous | 1.5                                      | –0.9                                      | 3.1 <sup>b</sup>                    | 4.2 <sup>b</sup>                        | –37                                   | 4                                    | 4                     | 142               | 1.00              |
|                          |                           |                      |                                          |                                           |                                     |                                         |                                       |                                      | PBO, 4                | PBO, 142          |                   |
| 34                       | Alendronate               | 5–40 mg              | 5.8                                      | 7.7                                       | 2.0                                 | 4.7                                     | –40 (at 6<br>months)                  | –52 (at 6<br>months)                 | 11                    | 210               | 0.83              |
| 26                       | Tiludronate               | 50 mg                |                                          | 1.0                                       |                                     |                                         |                                       |                                      | 14                    | 324               | 0.74              |
|                          | Tiludronate               | 200 mg               |                                          | 0.7                                       |                                     |                                         |                                       |                                      | 10                    | 324               | 0.52              |
|                          |                           |                      |                                          |                                           |                                     |                                         |                                       |                                      | PBO, 19               | PBO, 328          |                   |
| Totals                   |                           |                      |                                          |                                           |                                     |                                         |                                       |                                      | 2415                  | 69,369            |                   |

PBO, Placebo group. The sample size of the placebo group is shown only when more than one treatment group was analyzed; for other studies, the numbers of fracture cases and patient-years are given for the total sample (placebo plus treatment combined).

<sup>a</sup> Change *vs.* placebo.

<sup>b</sup> Femoral neck BMD (otherwise, total hip BMD was measured).

<sup>c</sup>  $P < 0.05$ .

in hip BMD at the end of each trial (instead of change at 1 yr) were also significantly ( $P = 0.022$ ) associated with fracture risk reductions, but the association did not quite reach significance for spine BMD ( $P = 0.065$ ). Changes in resorption and formation BCM were also significantly associated with nonvertebral fracture risk ( $P = 0.047$  and  $0.009$ , respectively). The models are multiplicative in nature; the resulting plots are almost straight, but not perfectly linear. Additional analyses, including the square and cube of BMD or BCM changes, did not improve the models (data not shown). The variable for treatment was not significant in any models that included variables for change in BMD or BCM. Thus, changes in BMD

or BCM appeared to explain a significant part of the risk reduction and indicate that there is no significant effect of treatment on fracture risk for treatments that were not associated with increases in BMD or moderate-to-large reductions in BCM (Figs. 1–4).

The regression coefficients (SE) corresponding to a 1% change at 1 yr were:  $-0.0816$  ( $0.0349$ ) for spine BMD,  $-0.267$  ( $0.0976$ ) for hip BMD,  $0.0067$  ( $0.0034$ ) for resorption BCM, and  $0.0134$  ( $0.0051$ ) for formation BCM. Taking into account the nonlinear nature of the models and the effect of treatment (this is necessary despite the lack of significance), the results predict that treatments with the largest increases in lumbar

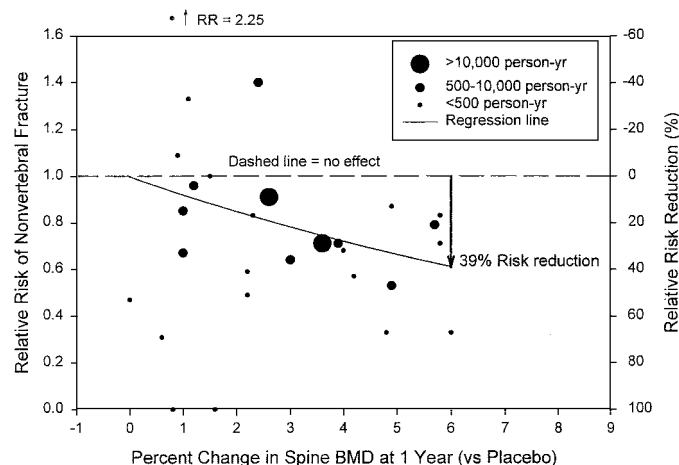

FIG. 1. RR of new nonvertebral fracture *vs.* change in spine BMD at 1 yr (*vs.* placebo) for randomized controlled trials of antiresorptive agents listed in Table 2. One point was off-scale, as indicated by the arrow ( $RR = 2.25$ ). The solid line represents the Poisson regression results in Figs. 1–4.

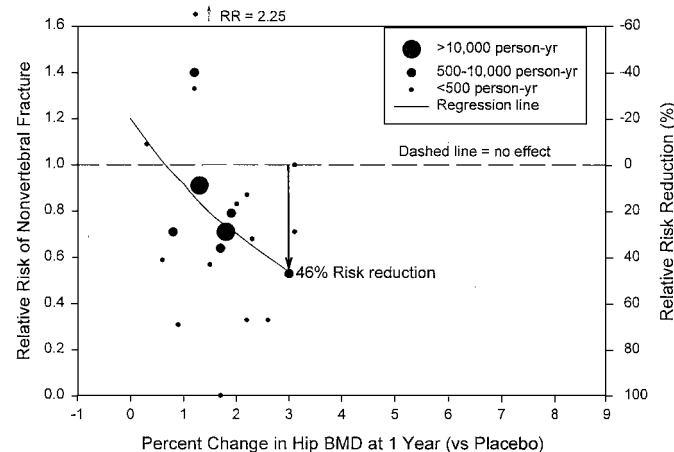

FIG. 2. RR of new nonvertebral fracture *vs.* change in hip BMD at 1 yr (*vs.* placebo) for randomized controlled trials of antiresorptive agents listed in Table 2. One point was off-scale, as indicated by the arrow ( $RR = 2.25$ ).

spine BMD at 1 yr, 6% *vs.* placebo, are associated with a 39% reduction in nonvertebral fracture risk (Fig. 1). The results also predict a 46% risk reduction for treatments that increase hip BMD by 3% *vs.* placebo at 1 yr, a 40% risk reduction for treatments that decrease resorption BCM by 70% *vs.* placebo at 1 yr, and a 44% risk reduction for treatments that decrease formation BCM by 50% *vs.* placebo at 1 yr (Figs. 2–4).

The changes in BMD were significantly ( $P \leq 0.002$ ) correlated with changes in BCM. The  $r^2$  values for changes in spine BMD at 1 yr were 0.80 *vs.* resorption BCM and 0.85 *vs.* formation BCM. The  $r^2$  values for changes in hip BMD at 1 yr were 0.58 *vs.* resorption BCM and 0.41 *vs.* formation BCM.

The Poisson regression results were generally robust in the sensitivity analysis. The results were basically unchanged when individual trials were removed singly (yielding 18 sensitivity models for each predictor, one model for each trial that was dropped). One exception was that the association for change in hip BMD remained significant, but the asso-

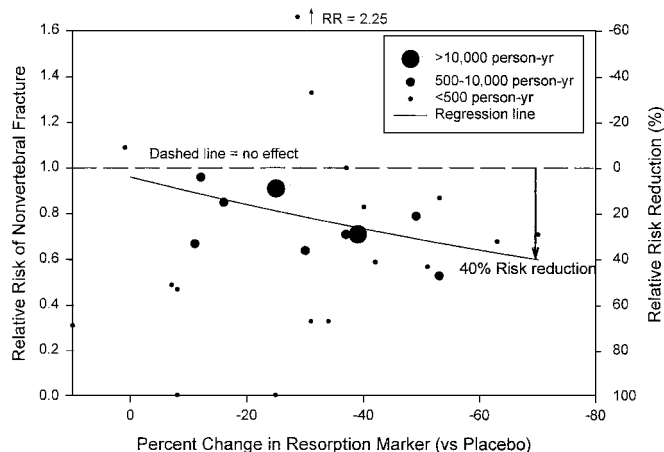

FIG. 3. RR of new nonvertebral fracture *vs.* change in resorption BCM at 1 yr (*vs.* placebo) for randomized controlled trials of antiresorptive agents listed in Table 2. One point was off-scale, as indicated by the arrow ( $RR = 2.25$ ).

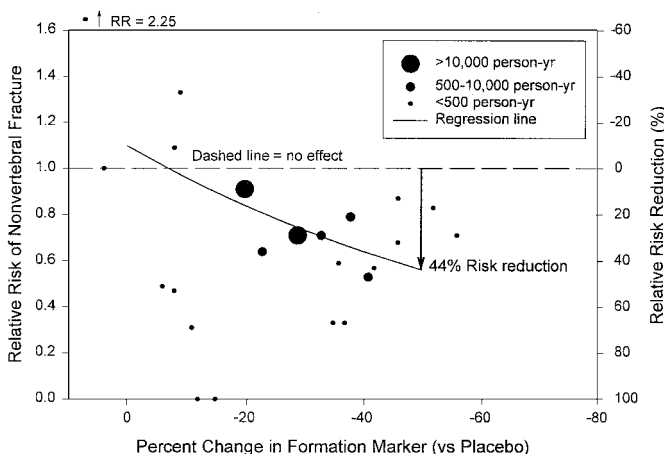

FIG. 4. RR of new nonvertebral fracture *vs.* change in formation BCM at 1 yr (*vs.* placebo) for randomized controlled trials of antiresorptive agents listed in Table 2. One point was off-scale, as indicated by the arrow ( $RR = 2.25$ ).

ciations for change in BCM (formation and resorption) and for spine BMD were not quite significant ( $P = 0.09$ – $0.17$ ) after excluding the large raloxifene study (7). Also, the association for change in resorption BCM was not quite significant ( $P = 0.11$ – $0.15$ ) when any one of three alendronate trials was excluded (22, 23, 28).

The results were also basically unchanged when all trials of the individual drugs calcitonin, etidronate, and risedronate were removed singly from the models. When the two raloxifene studies were removed from the models, the association for change in hip BMD remained significant, but the other associations were not quite significant ( $P = 0.08$ – $0.16$ ). When all alendronate studies were removed from the models, however, the associations were no longer significant. The alendronate trials contributed 22% of follow-up time and 29% of all fractures, whereas the raloxifene trials contributed 33% of follow-up time and 28% of all fractures. Thus, the loss of statistical significance is probably due to the large reduction in sampling units when these studies were dropped.



## Discussion

Osteoporosis is defined as a condition characterized by low BMD and increased fracture risk (35). Indeed, low BMD is a major determinant of increased fracture risk and is sufficient to justify treatment (1, 36). Osteoporosis in postmenopausal women is also associated with an elevated rate of bone turnover. This increase in bone turnover is accompanied by an imbalance in the ratio of bone resorption to formation, leading to decreases in the quantity or mass of bone, reflected by declines in BMD, loss of trabecular connectivity, and decreases in bone mineralization (37). High turnover is also accompanied by increased numbers of resorption lacunae, which represent focal areas of weakness. The structural defects coupled with the loss of bone mass result in decreased bone strength and increased fracture risk.

A number of antiresorptive agents, including alendronate, calcitonin, raloxifene, and risenedronate, have been approved by the U.S. Food and Drug Administration for the treatment of osteoporosis in postmenopausal women (36). There is evidence from randomized placebo-controlled clinical trials that these agents reduce the risk of radiographic vertebral fractures, although the evidence is weaker for calcitonin than for the other agents. However, not all of these agents have been shown to reduce the risk of nonvertebral fractures. In a meta-analysis of these and other randomized placebo-controlled clinical trials, Wasnich and Miller (15) noted a significant association between the amount of increase in BMD at both the lumbar spine and hip and the reduction in risk of new radiographic vertebral fractures, with a significant, independent effect of treatment. In the present meta-analysis, we report a significant association between the amount of increase in BMD at both the lumbar spine and hip during the first year of treatment and the reduction in risk of incident nonvertebral fractures without an independent effect of treatment. As with BMD, changes in markers of bone turnover during the first year of treatment were also significantly associated with fracture risk reductions, and without an independent effect of treatment. It was not possible to include both BMD and BCM in models, because they were correlated too highly. The results suggest that changes in BMD and BCM both provide similar information regarding reductions in nonvertebral fracture risk during treatment.

Both the earlier report (15) and the current meta-analyses found a significant association between increases in BMD and reductions in fracture risk during treatment with antiresorptive agents. How might one explain the differences in the results of the meta-analyses with regard to the independent effect of treatment? Specifically, there was an independent effect of treatment with an antiresorptive agent after adjusting for the effects of treatment on bone mineral density for vertebral fractures, but not for nonvertebral fractures. There are several potential mechanisms by which antiresorptive agents might reduce the risk of vertebral fractures to a greater extent than nonvertebral fractures: 1) a reduction in activation frequency with antiresorptive agents would lead to fewer, and possibly shallower, resorption sites; 2) the inhibition of excessive resorption allows compromised bone to respond to mechanical demands, preferentially thickening critical trabeculae; 3) reduction in bone turnover might pre-

vent perforation of trabecular plates and loss of trabecular connectivity in the vertebral bodies; and 4) reduction in bone turnover allows mineralization to proceed fully (38). Vertebral bodies have a larger proportion of trabecular bone than tubular appendicular bones. The rate of turnover in trabecular bone is approximately 30% per year, which is approximately 10 times greater than the rate for cortical bone. Small, but clinically significant reductions in bone turnover may produce significant reductions in vertebral fracture risk with albeit relatively small increases in BMD. Larger clinically significant changes in both bone turnover and BMD may be better indicators of effects on cortical bone and reductions in risk of nonvertebral fractures where cortical bone strength is involved to a greater extent. Indeed, in the present meta-analysis, there also was not an independent effect of treatment with an antiresorptive agent after adjusting for the effects of treatment on BCMs for nonvertebral fractures. The effects of antiresorptive therapy on parameters of bone geometry, which may affect fracture risk independently of both bone turnover and BMD, have not been explored as yet in clinical trials.

Considering that 18 sensitivity models were run for each predictor variable (one model for each dropped trial), the consistency of the results is reassuring. In almost all cases, most of the associations remained significant. The only exception was that the associations were no longer significant when all trials of alendronate were excluded. This is probably because a large number of sampling units were lost when the alendronate trials were excluded. Excluding the alendronate trials would also reduce the ability to detect an association by reducing the variability among studies, because many of the largest changes in BMD and BCM, and large reductions in fracture incidence, were observed in these trials.

Many studies were too small to have sufficient power to individually detect a significant effect on nonvertebral fracture risk or to provide estimates of effect size with meaningful confidence intervals. It is difficult to interpret the relationship with BMD or BCM changes by comparing individual studies because of the large variability in fracture risk reduction among studies, which may be related to chance, especially in the smaller studies. The variability in the magnitude of risk reductions among studies, together with the relatively large uncertainties for individual estimates, especially among smaller studies, makes it difficult to interpret whether reductions in risk during antiresorptive therapy are related to changes in BMD. The apparently large risk reductions in the absence of large BMD increases in some studies are probably due to chance, rather than real effects. Therefore, this meta-analysis pooled the data from all studies to obtain the best-fit estimate of the true relationship between changes in BMD and reductions in fracture risk. In general, our findings are consistent with those of large trials; there were no significant reductions in nonvertebral fracture risk for agents with smaller increases in BMD and smaller reductions in BCM (7, 9).

Our results have clinical implications for helping to determine which agents are most effective for reducing the risk of nonvertebral fractures. Our analyses indicate that agents which produce the largest increases in BMD and the largest

decreases in BCM are those which are most effective for reducing the risk of nonvertebral fractures and are in general agreement with the earlier analysis of BMD changes and reductions in vertebral fracture risk (15). These findings should not be used to attempt to predict antifracture benefits from changes in BMD or BCM of individual patients. Data on changes in BMD and BMC for individual patients were not available for the current analysis, and we did not explore how individual patient changes might relate to fracture risk. Individual patients may benefit from treatment even if BMD does not appear to increase initially; such patients may have experienced greater bone loss and fracture risk in the absence of treatment (39, 40). Also, one cannot extrapolate the findings observed here to agents other than antiresorptive compounds, such as PTH or fluoride. Increases in BMD with agents such as PTH are accompanied by increased, rather than decreased, BCM, suggesting a different mechanism of action (41).

Our study has some potential limitations, but the consequences, if any, are uncertain. There is a possibility that publication bias may have influenced the results. Trials that observed positive or significant results may tend to be published more often than those that did not. In this regard, results suggesting a possible reduction in nonvertebral fracture incidence in a clinical trial of tiludronate were reported for one small arm (used in our analysis), but comparable results were not provided for a much larger arm in the same trial (26). Differences in BCM assays among the trials also may have potential to influence the findings.

Our analysis illustrates the usefulness of meta-analysis for interpreting associations when results appear to be discordant. On the basis of these results, we conclude that the antifracture efficacy of antiresorptive agents is associated with changes in BMD for both nonvertebral and vertebral fractures. Agents that produce larger increases in BMD tend to provide greater reductions in both vertebral and nonvertebral fracture risk. In contrast to results seen with vertebral fractures, changes in BMD during treatment appear to explain all of the reduction in risk of nonvertebral fractures. Changes in BMD were highly correlated with changes in BCM, and we could not distinguish between the two in our analyses; there was no independent treatment effect after taking into account changes in either BMD or BCM. Thus, physicians treating patients with osteoporosis should choose agents that provide the greatest increases in BMD or reductions in BCM relative to placebo to reduce their patient's risk of both vertebral and nonvertebral fractures.

### Acknowledgments

Received April 3, 2001. Accepted December 20, 2001.

Address all correspondence and requests for reprints to: Dr. Marc Hochberg, 10 South Pine Street, Medical School Teaching Facility 8-34, Baltimore, Maryland 21201. E-mail: mhochber@umaryland.edu.

### References

1. Faulkner KG 2000 Bone matters: are density increases necessary to reduce fracture risk? *J Bone Miner Res* 15:183–187
2. Marshall D, Johnell O, Wedel H 1996 Meta-analysis of how well measures of bone mineral density predict occurrence of osteoporotic fractures. *Br Med J* 312:1254–1259

3. Schott AM, Cormier C, Hans D, Favier F, Hausherr E, Dargent-Molina P, Delmas PD, Ribot C, Sebert JL, Breart G, Meunier PJ 1998 How hip and whole body bone mineral density predict hip fracture in elderly women. The EPIDOS prospective study. *Osteoporos Int* 8:247–254
4. Curry JD 1986 Power law models for the mechanical properties of cancellous bone. *Eng Med* 15:153–154
5. Looker AC, Bauer DC, Chesnut III CH, Gundberg CM, Hochberg MC, Klees G, Kleerekoper M, Watts NB, Bell NH 2000 Clinical use of biochemical markers of bone remodeling: current status and future directions. *Osteoporos Int* 11:467–480
6. Ross PD, Kress BC, Parson RE, Wasnich RD, Armour KA, Mizrahi I 2000 Serum bone alkaline phosphatase and calcaneus bone density predict fractures: a prospective study. *Osteoporos Int* 11:76–82
7. Ettinger B, Black DM, Mitlak BH, Knickerbocker RK, Nickelsen T, Genant HK, Christiansen C, Delmas PD, Zanchetta JR, Stakkestad J, Gluer CC, Krueger K, Cohen FJ, Eckert S, Ensrud KE, Avioli LV, Lips P, Cummings SR 1999 Reduction of vertebral fracture risk in postmenopausal women with osteoporosis treated with raloxifene: results from a 3-year randomized clinical trial. *JAMA* 282:637–645
8. Harris ST, Watts NB, Genant HK, McKeever CD, Hangartner T, Keller M, Chesnut 3rd CH, Brown J, Eriksen EF, Hoeseyni MS, Axelrod DW, Miller PD 1999 Effects of risedronate treatment on vertebral and nonvertebral fractures in women with postmenopausal osteoporosis. *JAMA* 282:1344–1352
9. Chesnut III CH, Silverman S, Andriano K, Genant H, Gimona A, Harris S, Kiel D, LeBoff M, Maricic M, Miller P, Moniz C, Peacock M, Richardson P, Watts N, Baylink D 2000 A randomized trial of nasal spray salmon calcitonin in postmenopausal women with established osteoporosis: the Prevent Recurrence of Osteoporotic Fractures Study. *Am J Med* 109:267–276
10. Liberman UA, Weiss SR, Broll J, Minne HW, Quan H, Bell NH, Rodriguez-Portales J, Downs Jr RW, Dequeker J, Favus M 1995 Effect of oral alendronate on bone mineral density and the incidence of fractures in postmenopausal osteoporosis. *N Engl J Med* 333:1437–1443
11. Black DM, Cummings SR, Karpf DB, Cauley JA, Thompson DE, Nevitt MC, Bauer DC, Genant HK, Haskell WL, Marcus R, Ott SM, Torner JC, Quandt SA, Reiss TF, Ensrud KE 1996 Randomized trial of effect of alendronate on risk of fracture in women with existing vertebral fractures. *Lancet* 348:1535–1541
12. Cummings SR, Black DM, Thompson DE, Applegate WB, Barrett-Connor E, Musliner TA, Palermo L, Prineas R, Rubin SM, Scott JC, Vogt T, Wallace R, Yates AJ, LaCroix AZ 1998 Effect of alendronate on risk of fracture in women with low bone density but without vertebral fractures: results from the Fracture Intervention Trial. *JAMA* 280:2077–1082
13. Reginster JY, Minne HW, Sorensen OH, Hooper M, Roux C, Brandi ML, Lund B, Ethgen D, Pack S, Roumagnac I, Eastell R 2000 Randomized trial of the effects of risedronate on vertebral fractures in women with established postmenopausal osteoporosis. *Osteoporos Int* 11:83–91
14. Hochberg M 2000 Preventing fractures in postmenopausal women with osteoporosis: a review of recent controlled trials of antiresorptive agents. *Drugs Aging* 7:317–330
15. Wasnich RD, Miller PD 2000 Antifracture efficacy of antiresorptive agents are related to changes in bone density. *J Clin Endocrinol Metab* 85:231–236
16. Hochberg MC, Ross PD, Black D, Cummings SR, Genant HK, Nevitt MC, Barrett-Connor E, Musliner T, Thompson D 1999 Larger increases in bone mineral density during alendronate therapy are associated with a lower risk of new vertebral fractures in women with postmenopausal osteoporosis. *Arthritis Rheum* 42:1246–1254
17. Delmas PD 2000 How does antiresorptive therapy decrease the risk of fracture in women with osteoporosis? *Bone* 27:1–3
18. Tonino RP, Meunier PJ, Emkey R, Rodriguez-Portales JA, Menkes CJ, Wasnich RD, Bone HG, Santora AC, Wu M, Desai R, Ross PD 2000 Skeletal benefits of alendronate: 7-year treatment of postmenopausal osteoporotic women. *J Clin Endocrinol Metab* 85:3109–3115
19. Eastell R, Barton I, Hannon RA, Garnero P, Chines A, Pack S, Delmas PD 2001 Antifracture efficacy of risedronate: prediction by change in bone resorption markers. *J Bone Miner Res* 16(Suppl 1):S163
20. Meunier PJ 1999 Evidence-based medicine and osteoporosis: a comparison of fracture risk reduction data from osteoporosis randomised clinical trials. *Int J Clin Pract* 53:122–129
21. Overgaard K, Hansen MA, Jensen SB, Christiansen C 1992 Effect of salcalcinonin given intranasally on bone mass and fracture rates in established osteoporosis: a dose-response study. *Br Med J* 305:556–561
22. Black D, Thompson DE, Bauer D, Ensrud K, Musliner T, Hochberg MC, Nevitt MC, Suryawanshi S, Cummings SR 2000 Fracture risk reduction with alendronate in women with osteoporosis: The Fracture Intervention Trial. *J Clin Endocrinol Metab* 85:4118–4124
23. Pols HAP, Felsenberg D, Hanley DA, Stepan J, Munoz-Torres M, Wilkin TJ, Qin-sheng G, Galich AM, Vandormael K, Yates AJ, Stych B 1999 Multinational, placebo-controlled, randomized trial of the effects of alendronate on bone density and fracture risk in postmenopausal women with low bone mass: results of the FOSIT study. *Osteoporos Int* 9:461–468
24. Harris ST, Watts NB, Jackson RD, Genant HK, Wasnich RD, Ross P, Miller PD, Licata AA, Chesnut 3rd CH 1993 Four-year study of intermittent cyclic

- etidronate treatment of postmenopausal osteoporosis: three years of blinded therapy followed by one year of open therapy. *Am J Med* 95:557–567
25. Karpf DB, Shapiro DR, Seeman E, Ensrud KE, Johnston Jr CC, Adami S, Harris ST, Santora 2nd AC, Hirsch LJ, Oppenheimer L, Thompson D 1997 Prevention of nonvertebral fractures by alendronate. A meta-analysis. *JAMA* 277:1159–1164
  26. Reginster JY, Christiansen C, Roux C, Fechtenbaum J, Rouillon A, Tou KP 2001 Intermittent cyclic tiludronate in the treatment of osteoporosis. *Osteoporos Int* 12:169–177
  27. Storm T, Thamsborg G, Steiniche T, Genant HK, Sorensen OH 1990 Effect of intermittent cyclical etidronate therapy on bone mass and fracture risk in women with postmenopausal osteoporosis. *N Engl J Med* 332:1265–1271
  28. Bone HG, Downs Jr RW, Tucci JR, Harris ST, Weinstein RS, Licata AA, McClung MR, Kimmel DB, Gertz BJ, Hale E, Polvino WJ 1997 Dose-response relationships for alendronate treatment in osteoporotic elderly women. *J Clin Endocrinol Metab* 82:265–274
  29. Adami S, Passeri M, Ortolani S, Broggin M, Carratelli L, Caruso I, Gandolini G, Gnessi L, Laurenzi M, Lombardi A, Norbiato G 1995 Effects of oral alendronate and intranasal salmon calcitonin on bone mass and biochemical markers of bone turnover in postmenopausal women with osteoporosis. *Bone* 17:383–390
  30. Bone HG, Greenspan SL, McKeever C, Bell N, Davidson M, Downs RW, Emkey R, Meunier PJ, Miller SS, Mulloy AL, Recker RR, Weiss SR, Heyden N, Musliner T, Suryawanshi S, Yates AJ, Lombardi A 2000 Alendronate and estrogen effects in postmenopausal women with low bone mineral density. *J Clin Endocrinol Metab* 85:720–726
  31. Lufkin EG, Whitaker MD, Nickelsen T, Argueta R, Caplan RH, Knickerbocker RK, Riggs BL 1998 Treatment of established postmenopausal osteoporosis with raloxifene: a randomized trial. *J Bone Miner Res* 13:1747–1754
  32. Clemmesen B, Ravn P, Zegels B, Taquet AN, Christiansen C, Reginster JY 1997 A 2 year phase II study with 1-year of follow-up of risedronate (NE-58095) in postmenopausal osteoporosis. *Osteoporos Int* 7:488–495
  33. McClung MR, Geusens P, Miller PD, Zippel H, Bensen WG, Roux C, Adami S, Fogelman I, Diamond T, Eastell R, Meunier PJ, Reginster JY; Hip Intervention Program Study Group 2001 Effect of risedronate on the risk of hip fracture in elderly women. *New Engl J Med* 344:333–340
  34. Chesnut III CH, McClung MR, Ensrud KE, Bell NH, Genant HK, Harris ST, Singer FR, Stock JL, Yood RA, Delmas PD, Kher V, Pryor-Tillotson S, Santora II AC 1995 Alendronate treatment of the postmenopausal osteoporotic woman: effect of multiple dosages on bone mass and bone remodeling. *Am J Med* 99:144–152
  35. Anonymous 1993 Consensus development conference: diagnosis, prophylaxis and treatment of osteoporosis. *Am J Med* 94:646–650
  36. National Osteoporosis Foundation 1998 Physician's guide to prevention and treatment of osteoporosis. Belle Mead, NJ: Excerpta Medica
  37. Meunier PJ, Boivin G 1997 Bone mineral density reflects bone mass but also the degree of mineralization of bone: therapeutic implications. *Bone* 21:373–377
  38. Boivin GY, Chavassieux PM, Santora AC, Yates J, Meunier PJ 2000 Alendronate increases bone strength by increasing the mean degree of mineralization of bone tissue in osteoporotic women. *Bone* 27:687–694
  39. Cummings SR, Palermo L, Browner W, Marcus R, Wallace R, Pearson J, Blackwell T, Eckert S, Black D 2000 Monitoring osteoporosis therapy with bone densitometry: misleading changes and regression to the mean. *JAMA* 283:1318–1321
  40. Cummings SR, Palermo L, Ensrud KE, Hochberg MC 2000 Are nonresponders responding? *J Bone Miner Res* 15(Suppl 1):S144
  41. Horwitz M, Stewart A, Greenspan SL 2000 Sequential parathyroid hormone/alendronate therapy for osteoporosis: robbing Peter to pay Paul? *J Clin Endocrinol Metab* 85:2127–2128
